# Supplementary material for: Oxygen storage capacityversuscatalytic activity of ceria–zirconia solid solutions in CO and HCl oxidation
Source: Royal Society of Chemistry journal article supplement (doi:10.1039/c9cy00222g), 2019-01-01
Supplement: c9cy00222g1.pdf [file c9cy00222g1.pdf]

## Supporting Information

### Oxygen Storage Capacity versus catalytic activity in the CO and HCl oxidation: A Case study of Ceria-Zirconia solid solution

Yu Sun<sup>a,b</sup>, Chenwei Li<sup>a,b</sup>, Igor Djerdj<sup>c</sup>, Omeir Khalid<sup>b</sup>, Pascal Cop<sup>b</sup>, Joachim Sann, Tim Weber,  
Sebastian Werner<sup>b</sup>, Kevin Turke<sup>b</sup>, Yanglong Guo<sup>a,\*</sup>, Bernd M. Smarsly<sup>b,\*</sup>, Herbert Over<sup>b,\*</sup>

*a) Key Laboratory for Advanced Materials, Research Institute of Industrial Catalysis, School of Chemistry and Molecular Engineering, East China University of Science and Technology, Shanghai 200237, PR China*

*b) Physikalisch-Chemisches Institut, Justus Liebig University, Heinrich-Buff-Ring 17, 35392 Giessen, Germany*

*c) Department of Chemistry, J. J. Strossmayer University of Osijek, Ulica cara Hadrijana 8/a, HR-31000 Osijek, Croatia*

\* Corresponding authors: E-mail: [herbert.over@phys.chemie.uni-giessen.de](mailto:herbert.over@phys.chemie.uni-giessen.de);  
[Bernd.Smarsly@phys.Chemie.uni-giessen.de](mailto:Bernd.Smarsly@phys.Chemie.uni-giessen.de); [ylguo@ecust.edu.cn](mailto:ylguo@ecust.edu.cn)

**Table S1.** The BET surface area of CZ080 with different reaction time. The reaction temperature during the reaction was 430 °C and the reaction condition: Ar: HCl: O<sub>2</sub> = 7:1:2. A total flow rate of 15sccm was applied. The mass of catalyst is 120mg.

| Samples    | BET Surface Area- Fresh/ m <sup>2</sup> /g | Pore Volume / cm <sup>3</sup> /g |
|------------|--------------------------------------------|----------------------------------|
| CZ080      | 44                                         | 0.164                            |
| CZ080-0.5h | 37                                         | 0.145                            |
| CZ080-2h   | 37                                         | 0.147                            |
| CZ080-4h   | 36                                         | 0.156                            |
| CZ080-8h   | 38                                         | 0.156                            |
| CZ080-24h  | 36                                         | 0.157                            |

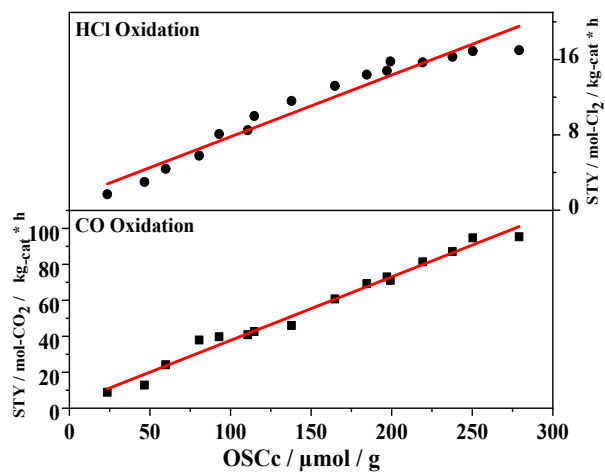

**Figure S1:** HCl oxidation activity of the as-prepared CZ<sub>xxx</sub> samples (xxx = 0 -100) versus their respective plain and complete oxygen storage capacity (OSC<sub>c</sub> and OSC, respectively).
